# Supplementary material for: Real-world use of procalcitonin and other biomarkers among sepsis hospitalizations in the United States: A retrospective, observational study
Source: PubMed Central journal article supplement (PMC6192638; doi:10.1371/journal.pone.0205924), 2018-10-17

**S1 FIG****A**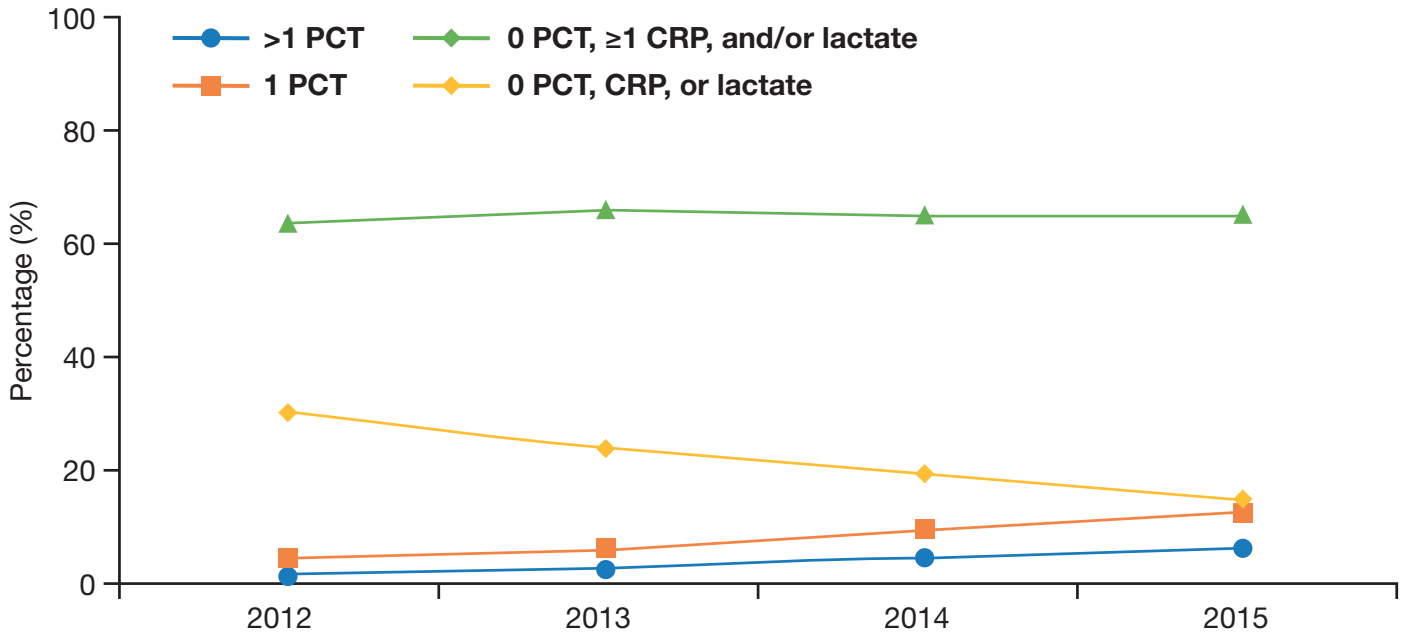**B**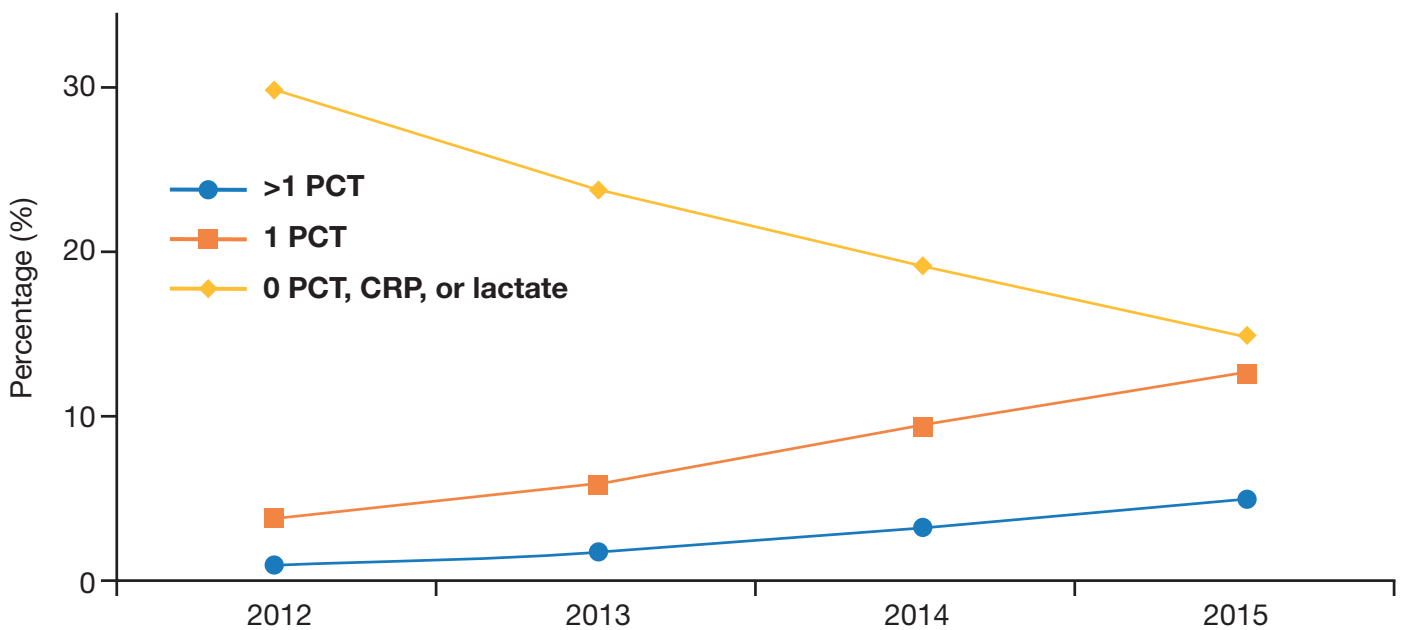

Supplement: pone.0205924.s007.pdf [file pone.0205924.s007.pdf]
